1 **Title Page:**

2 **Consistency of the continuous flow pressure gradient despite**  
3 **aortic arch anomalies co-existing with coarctation**

4 Arash Ghorbannia PhD<sup>1,2</sup>, Andrew D. Spearman MD<sup>2</sup>, Shahd Sawalhi BS<sup>1</sup>, Ronald K. Woods MD PhD<sup>3</sup>,  
5 Mehdi Maadooliat PhD<sup>4</sup>, John F. LaDisa, Jr. PhD<sup>1,2,5</sup>

6 <sup>1</sup>Department of Biomedical Engineering, Marquette University and the Medical College of  
7 Wisconsin, Milwaukee, Wisconsin, USA

8 <sup>2</sup>Department of Pediatrics - Division of Cardiology, Herma Heart Institute, Children's Wisconsin and  
9 the Medical College of Wisconsin, Milwaukee, Wisconsin, USA

10 <sup>3</sup>Division of Pediatric Cardiothoracic Surgery, Department of Surgery, Medical College of  
11 Wisconsin, Herma Heart Institute, Children's Wisconsin, Milwaukee, Wisconsin, USA

12 <sup>4</sup>Department of Mathematical and Statistical Sciences, Marquette University, Milwaukee, Wisconsin,  
13 USA

14 <sup>5</sup>Departments of Physiology, and Medicine - Division of Cardiovascular Medicine, Medical College  
15 of Wisconsin, Milwaukee, Wisconsin, USA

16 **Emails:** [ghorbannia@outlook.com](mailto:ghorbannia@outlook.com), [aspearman@childrenswi.org](mailto:aspearman@childrenswi.org), [shahd.sawalhi@marquette.edu](mailto:shahd.sawalhi@marquette.edu),  
17 [rwoods@mcw.edu](mailto:rwoods@mcw.edu), [mehdi.maadooliat@marquette.edu](mailto:mehdi.maadooliat@marquette.edu), [jladisa@mcw.edu](mailto:jladisa@mcw.edu)

18 **Address for correspondence:** Arash Ghorbannia, 8701 W Watertown Plank Rd., Milwaukee, WI  
19 53226, phone: 414 955-8671, fax: 414 955-0084, email: [ghorbannia@outlook.com](mailto:ghorbannia@outlook.com)

20 **Disclosure:** The authors declare that the research was conducted in the absence of any  
21 commercial or financial relationships that could be construed as a potential conflict of interest.

22 **Funding:** NIH: R01-HL142955 and R15-HL096096

23 **Word count:** 2787

24 **Abstract**

25 Aims: Severity assessment for coarctation of the aorta (CoA) is challenging due to  
26 concomitant morphological anomalies (complex CoA) and inaccurate Doppler-based indices.  
27 Promising diagnostic performance has been reported for the continuous flow pressure gradient  
28 (CFPG), but it has not been studied in complex CoA. Our objective was to characterize the effect  
29 of complex CoA and associated hemodynamics on CFPG in a clinical cohort.

30 Methods and Results: Retrospective analysis identified discrete juxtaductal (n=25) and  
31 complex CoA (n=43; transverse arch and/or isthmus hypoplasia) patients with arm-leg systolic  
32 blood pressure gradients (BPG) within 24 hours of echocardiography for comparison to BPG by  
33 conventional Doppler indices (simplified Bernoulli equation and modified forms correcting for  
34 proximal kinetic energy and/or recovered pressure). Results were interpreted using the current  
35 CoA guideline (BPG  $\geq 20$  mmHg) to compare diagnostic performance indicators including receiver  
36 operating characteristic curves, sensitivity, specificity, and diagnostic accuracy, among others.  
37 Echocardiography Z-scored aortic diameters were applied with computational stimulations from a  
38 preclinical CoA model to understand aspects of the CFPG driving performance differences.

39 Diagnostic performance was substantially reduced from discrete to complex CoA for  
40 conventional Doppler indices calculated from patient data, and by hypoplasia and/or long segment  
41 stenosis in simulations. In contrast, diagnostic indicators for the CFPG only modestly dropped for  
42 complex vs discrete CoA. Simulations revealed differences in performance due to inclusion of the  
43 Doppler velocity index and diastolic pressure half-time in the CFPG calculation.

44 Conclusion: CFPG is less affected by aortic arch anomalies co-existing with CoA when  
45 compared to conventional Doppler indices.

46 **Keywords**

47 Echocardiography, Antegrade diastolic flow, Diastolic runoff, Long Segment Coarctation,

48 Hypoplastic Aortic Arch, simulation, hypertension

## 49 **Abbreviations:**

|        |                                         |
|--------|-----------------------------------------|
| AA     | Ascending aorta                         |
| BP     | Blood pressure                          |
| CFPG   | Continuous flow pressure gradient       |
| CoA    | Coarctation of the aorta                |
| DBP    | Diastolic blood pressure                |
| DVI    | Doppler velocity index                  |
| MBE    | Modified Bernoulli equation             |
| PC-MRI | Phase contrast magnetic resonance image |
| ROM    | Reduced order model                     |
| SBE    | Simplified Bernoulli equation           |
| SBE-RP | SBE modified for recovered pressure     |
| SBP    | Systolic blood pressure                 |

## 50 **Introduction**

51 Coarctation of the aorta (CoA) is a constriction of the thoracic aorta and is one of the most  
52 common congenital cardiovascular defects<sup>1-3</sup>. While surgery is the optimal treatment in most  
53 infants, 5-30% of treated patients develop re-coarctation requiring reintervention<sup>4</sup> and > 90%  
54 develop hypertension after 50 years of age<sup>5</sup>. Guidelines for intervention include a transcatheter  
55 peak-to-peak CoA gradient (BPGpp)  $\geq 20$  mmHg that is often regarded as hemodynamically  
56 significant<sup>6</sup>.

57 Despite allowing for direct measurement of the gradient, catheterization is an invasive  
58 procedure with potentially unwanted risks<sup>7</sup>. BPGpp can also be estimated via cuffs placed on the  
59 arms and legs. However, this is difficult in patients clinically due to children who may be upset,

60 crying or scared during measurement, and/or inappropriately sized cuffs<sup>8-10</sup>. Moreover, CoA  
61 patients frequently have anomalies in their arterial anatomy that limit accurate determination of  
62 BPGpp via BP cuffs. For example, the left subclavian artery is hypoplastic in many patients, and  
63 branches distal to the coarctation in ~5% of patients<sup>11</sup>. Non-invasive alternatives using continuous  
64 wave Doppler are therefore commonly applied in echocardiography to estimate the BPGpp<sup>12</sup>. This  
65 often involves the systolic gradient estimated from peak Doppler velocity using the simplified  
66 Bernoulli equation (SBE), or modified forms correcting for proximal kinetic energy (i.e., modified  
67 Bernoulli equation: MBE) and/or recovered pressure (SBE-RP)<sup>13</sup>. These conventional Doppler  
68 estimates are known to have poor agreement with catheterization<sup>14</sup>. Sources of disagreement  
69 include local discrepancy in aortic dynamic distensibility, simplification of the Bernoulli equation,  
70 and morphological variability, which can result in a substantial Doppler misclassification<sup>1,15</sup>. This  
71 misclassification is a critical barrier to assessing treatment modifications and translation since  
72 interpretation of new thresholds is best done using tools with a high degree of accuracy and  
73 diagnostic performance.

74 In contrast to tools exclusively focused on the systolic pressure gradient, we recently reported  
75 on a novel Doppler-based tool that accounts for the diastolic pressure gradient, which we termed  
76 the continuous flow pressure gradient (CFPG)<sup>15</sup>. Importantly, the CFPG was recently reported as  
77 an independent predictor of hemodynamic severity in the setting of discrete CoA devoid of  
78 complications found in complex CoA<sup>1</sup>. The physiologic underpinnings of a pronounced diastolic  
79 gradient can be explained by the prolonged recoil (i.e. capacitance) of the proximal aorta in  
80 response to the flow-limiting stenosis that leads to antegrade diastolic run-off with a typical  
81 sawtooth velocity decay<sup>1</sup>. As mentioned above, CoA in patients often includes hypoplasia in one  
82 or more arch segments presenting in concert with discrete CoA, or a long segment stenosis

83 resulting in additional sites of local blood flow acceleration (i.e., complex CoA). The objective of  
84 the current study was to assess the diagnostic performance of the CFPG relative to conventional  
85 Doppler indices in a pediatric cohort of discrete and complex CoA cases. We further set out to  
86 determine the aspects of the CFPG that are driving differences in performance relative to  
87 conventional Doppler-based indices, which was conducted using Z-scored aortic diameters from  
88 the pediatric cohort in concert with representative computational hemodynamic simulations based  
89 on a preclinical model of CoA.

## 90 **Methods**

91 Study design and patient involvement. To identify the most relevant research topics and  
92 meaningful outcomes, the study was specially designed with the help of colleagues from the  
93 Division of Pediatric Cardiothoracic Surgery at Children’s Wisconsin and Herma Heart Institute,  
94 but no direct patient involvement was considered due to retrospective nature of the study design.  
95 After exempt determination by the IRB Board of Children’s Wisconsin, analysis of 259 CoA  
96 patients of either sex identified 25 cases with discrete juxtaductal CoA and 43 with complex CoA  
97 (transverse arch and/or isthmus hypoplasia), as well as contemporaneous arm-leg systolic blood  
98 pressure gradients via sphygmomanometry within 24 hours of echocardiography. Despite potential  
99 limitations<sup>8–10</sup>, sphygmomanometry was interpreted as a ground-truth for Doppler-based estimates  
100 of the gradient from CoA since catheter-based BP gradients were not available. Patients with patent  
101 ductus arteriosus, more than mild aortic valve insufficiency, other hemodynamically significant  
102 congenital heart diseases, low cardiac output state, and abnormal ventricular systolic function on  
103 echocardiography examination were excluded. Table 1 summarizes patient characteristics.

104 Echocardiographic measurements included conventional peak instantaneous pressure gradient  
105 estimation by SBE, MBE and SBE-RP<sup>16</sup>. An estimate of the pressure gradient during diastole was

106 also calculated using diastolic flow continuation as characterized by the CFPG discussed in detail  
107 elsewhere<sup>1</sup>. All measurements were quantified from 2D and spectral Doppler images with early  
108 diastolic velocity identified at the end of the T wave<sup>1</sup>. Details related to echo quantification  
109 methods are summarized in Supplemental Table 1.

110 Computational assessment of Doppler-derived index performance. Computational models  
111 were constructed using a pre-clinical rabbit model mimicking CoA in patients<sup>17,18</sup> since  
112 measurements necessary to replicate physiology and aortic morphology beyond the coarctation  
113 region were not available in the echocardiography data from pediatric patients retrospectively  
114 studied. This approach allowed for understanding of hemodynamic factors impacting and/or  
115 potentially limiting the utility of the Doppler-based indices studied, including CFPG. Arterial  
116 segments were generated in SimVascular (simtk.org) using a control rabbit MRI dataset obtained  
117 following Institutional Animal Care and Use Committee approval<sup>2</sup>. The aortic diameter was then  
118 quantified at various locations throughout the thoracic aorta. This step was important to identify  
119 the normal population sized as baseline and realistically replicate discrete and complex CoA  
120 characteristics by matching Z-scores from computational models to the clinical datasets.

121 Model construction involved centerline detection, segmentation using a semi-automated level  
122 set method<sup>19</sup>, and lofting to create the blood flow domain. An in-house code was then developed  
123 to generate local modifications with the guidance of a pediatric cardiovascular surgeon by  
124 smoothly scaling aortic cross-sectional area according to shape functions<sup>20</sup> representing different  
125 types of complex CoA including long-segment CoA, arch and isthmus hypoplasia (Supplemental  
126 Figure 1). The resulting morphological properties replicated Z-scores observed at the equivalent  
127 locations for each of the pediatric CoA patients<sup>21</sup>. A total of 68 computational aortas (25 with  
128 discrete CoA and 43 with complex CoA) were created. The aorta models were then integrated with

129 arch branches (Supplemental Figure 2) for hemodynamic simulations with one inlet at the Sino-  
130 tubular junction and outlets at each of the head and neck arteries.

131 One-dimensional computational reduced order models (ROM) were generated in SimVascular  
132 ([simvascular.github.io/](https://simvascular.github.io/)) from the 3D CoA models<sup>22</sup>. The ROM approach was chosen for fast  
133 determination of hemodynamic results used to calculate Doppler indices (Supplemental Table 1)  
134 and automating the simulation process as compared to a semi-automated computationally intensive  
135 process required for 3D simulations with additional spatiotemporal information not necessary for  
136 the purpose of calculating Doppler-derived indices. A 3-element Windkessel model was  
137 implemented at each outlet to realistically replicate downstream pressure-flow relationships<sup>23</sup>  
138 based on empirical measurements of pressure and flow from rabbits with discrete CoA.  
139 Windkessel model parameters were then adjusted to represent hemodynamics for complex CoA  
140 cases (see details in Supplemental Table 2). Data from discrete CoA rabbits with 42-96% area  
141 obstruction were used to replicate clinical BPGpp<sup>18</sup> and the influence of CoA on thickness and  
142 stiffness after remodeling of the wall that were included in computational simulations (see  
143 supplementary materials).

144 Statistical analysis. Hypoplasia proximal to the CoA was quantitatively characterized using  
145 Z-score criteria<sup>24</sup>. Arch and isthmus hypoplasia was considered significant for Z-scores  $< -3.0$  (i.e.,  
146 dimensions in the lowest 0.1% of the population). Pearson's correlation and linear regression were  
147 used to characterize the relationship between Doppler-based estimates and simulated pressure  
148 gradients. Adjusted R-squared values quantified the degree of scatter for each CoA severity and  
149 morphology studied. Diagnostic performances were compared via receiver operative characteristic  
150 (ROC) curves and relative to the current intervention guideline<sup>17,25</sup> (i.e., BPGpp  $\geq 20$  mmHg). The  
151 optimum cutoffs for Doppler indices were identified by maximizing the sum of sensitivity and



152 specificity, (i.e.; the Youden index<sup>26</sup>) and the area under the ROC curves (AUC) was compared  
153 using two-tailed student's t-test with 5 and 10% significance levels. Finally, sensitivity, specificity,  
154 positive predictive values (PPV), negative predictive value (NPV), diagnostic odds ratio, and  
155 diagnostic accuracy were also quantified as measures of diagnostic performance. Reliability of the  
156 echo-based measurements used in calculating metrics including, SBE, MBE, SBE-RP, and indices  
157 used in the calculation of the CFPG including the diastolic pressure half-time (dPHT) and Doppler  
158 velocity index (DVI) was investigated using intraclass correlation coefficient (ICC) through SPSS  
159 software. Two observers were trained to quantify echo-based indices on a random subgroup of  
160 simulation and pediatric CoA patient datasets (n=10). Each metric was quantified in triplicate for  
161 inter-observer variability with median values used for intra-observer variability analysis<sup>27</sup>.

## 162 **Results**

163 Doppler quantification from the cohort of pediatric CoA patients showed decreases in  
164 diagnostic performance moving from discrete to complex CoA morphologies, where correlation  
165 to proximal acceleration was evident. For example, the diagnostic accuracy was 0.88, 0.87, 0.79  
166 for SBE, MBE, and SBE-RP indices from discrete CoA cases. These values dropped to 0.69, 0.59,  
167 and 0.59 for complex CoA cases, respectively. The diagnostic accuracy of CFPG was 0.96 for  
168 discrete CoA morphologies, and modestly dropped to 0.88 for complex CoA data sets. A detailed  
169 list of diagnostic performance indicators is provided in Table 2.

170 Similar patterns of reduced diagnostic performance were observed from the ROC analysis and  
171 AUCs. Specifically, the AUC was 0.91, 0.91, and 0.90 for conventional Doppler indices (i.e., SBE,  
172 MBE, and SBE-RP), which all significantly dropped to 0.80, 0.83, and 0.85, respectively (p-values  
173 <0.01, Table 2). On the other hand, the AUC for CFPG remained high at 0.98-0.99 despite  
174 additionally narrowing proximal to the coarctation for complex CoA cases (Table 2).

175 Reliability of the echo-based measurements used in calculating CFPG as quantified by ICC  
176 index revealed  $\leq 9.8$  and 11.2% differences among inter and intra-observer measurements,  
177 respectively. ICC index also confirmed good to excellent inter and intra-observer agreement in the  
178 conventional Doppler indices quantified. The 95% confidence interval for ICC was [0.86,0.98] for  
179 single subject variability and [0.91,0.99] on average, which is referred as excellent reliability  
180 according to Cicchetti et al<sup>28</sup> and good according to Koo et al<sup>27</sup>.

181 Before assessing the diagnostic performance of each Doppler-based index quantified using  
182 echo data from the retrospective cohort of pediatric CoA patients via simulation, we first confirmed  
183 morphological similarity via Z-scores. Z-scores at the proximal transverse arch, distal transverse  
184 arch and aortic isthmus region were  $-3.22 \pm 0.81$ ,  $-3.01 \pm 0.72$ , and  $-3.23 \pm 1.50$  in the cohort of  
185 pediatric CoA patients, and corresponding values from computational models were  $-3.18 \pm 1.18$ ,  
186  $3.11 \pm 0.52$ , and  $3.17 \pm 1.68$ , which were not significantly different (p-values  $> 0.1$ ).

187 When compared to a discrete CoA, predictive values from conventional Doppler indices from  
188 ROM simulations were substantially reduced by the addition of hypoplasia and/or long segment  
189 stenosis in the arch. Specifically, the diagnostic accuracy was 0.63, 0.82, 0.80 for SBE, MBE, and  
190 SBE-RP indices for simulations with discrete CoA configurations. These values dropped to 0.48,  
191 0.80, and 0.73 for simulations of complex CoA models, respectively. In contrast, the diagnostic  
192 accuracy of CFPG was 0.90 for simulations of discrete CoA morphologies, and only modestly  
193 dropped to 0.83 for simulations of complex CoA. A detailed list of predictive values is provided  
194 in Table 3.

195 A similar pattern of reduced diagnostic performance was observed in AUCs calculated from  
196 ROC curves of Doppler indices determined by discrete CoA simulations (Figure 1, Table 3).  
197 Specifically, the AUC was 0.90, 0.90, and 0.89 for conventional Doppler indices (i.e., SBE, MBE,

198 and SBE-RP) calculated from simulations, which significantly dropped to 0.83, 0.86, and 0.83,  
199 respectively (p-values <0.01, Table 2). Moving from discrete to complex CoAs, ROC analysis  
200 showed a pronounced shift towards non-diagnostic line (identity line, bottom left-to upper-right)  
201 for simulations of conventional Doppler indices. On the other hand, ROC curves obtained by  
202 CFPG calculated from simulations were relatively unchanged.

203 For simulations of discrete CoA, regression analysis resulted in  $R^2 = 0.88$  for CFPG and 0.74-  
204 0.76 for conventional Doppler indices (Figure 2). Simulations of complex CoAs revealed the  
205 impact concomitant anomalies had on resulting flow patterns. For example, hemodynamic  
206 alterations including proximal acceleration and increased jet velocity were observed resulting in a  
207 higher degree of scatter (Figure 2). These factors decreased  $R^2$  values for conventional Doppler  
208 indices from simulations to 0.51-0.62, but to a lesser extent for CFPG calculated from simulations  
209 (0.78), indicating that CFPG outperformed conventional Doppler indices for simulations of both  
210 discrete and complex CoA.

## 211 **Discussion**

212 Suboptimal agreement with gold-standard catheterization represents a major limitation of  
213 conventional Doppler-derived indices used for non-invasive CoA severity assessment<sup>14,29</sup>.  
214 Although diastolic continuation of flow and estimation of its associated pressure gradient using  
215 the CFPG index previously showed strong correlation with measured values in a group of 25  
216 discrete CoA patients<sup>1</sup>, its performance relative to conventional Doppler-derived indices had not  
217 been assessed in complex CoA morphologies. The main finding of the current study is that the  
218 CFPG was more consistent than any of the other Doppler-derived indices studied in the setting of  
219 complex CoA in a cohort of pediatric patients. It is also important to note that our results indicate

220 the CFPG better correlates with arm-leg pressure gradients than the other Doppler-derived indices  
221 studied.

222 Performance differences among our novel CFPG method and conventional Doppler-derived  
223 indices can be understood relative to the contribution of local stenoses beyond discrete CoA using  
224 the simulations recounted above where physiologic boundary conditions were used to  
225 computationally investigate the diagnostic performance of CFPG and three conventional Doppler  
226 indices (SBE, MBE, and SBE-RP). Special care was taken to replicate morphological anomalies  
227 seen in complex forms of pediatric CoA patients by implementing similar Z-scores in proximal  
228 transverse arch, distal transverse arch, and aortic isthmus regions characterizing arch hypoplasia  
229 relative to the normal population<sup>24</sup> (Table 1).

230 Differences in performance made clear by these simulations are rooted in the fact that the  
231 CFPG includes several additional sub-indices described in Supplemental Table 1, namely the DVI  
232 and dPHT, which consider the hemodynamic changes resulting in complex CoA cases. For  
233 example, in complex CoA, the DVI (proximal to jet peak velocity ratio) can increase due to  
234 proximal acceleration from a hypoplastic arch or isthmus (Figure 3, left). This leads to  
235 underestimation of CoA (Figure 2, B and C), and leads to discrepancy between discrete and  
236 complex CoA cases. However, the dPHT, which represents the time to half of the early diastolic  
237 pressure ( $V_d$  to  $\frac{\sqrt{2}}{2} V_d$  interval on the spectral doppler image, see Supplemental Table 1) accounts  
238 for the prolonged recoil of the proximal aorta and associated antegrade diastolic flow. This leads  
239 to consistent behavior of the dPHT in the setting of additional proximal stenoses in the form of a  
240 hypoplastic arch and/or isthmus (Figure 3, right).

241 Consequently, although a mixed behavior is possible due to the DVI and dPHT having  
242 opposite effects on the CFPG as indicated in Supplemental Figure 3, the CFPG is still relatively

243 insensitive to proximal acceleration in the clinical ranges of complex CoA studied. Specifically,  
244 CFPG increases with dPHT making it more sensitive to additional proximal narrowing while, on  
245 the other hand, it decreases with DVI as is also seen in MBE and SBE-RP. Therefore, collectively  
246 the CFPG performance tends to be less affected by the proximal acceleration as suggested in the  
247 AUCs shown in Figure 1 and values reported in Table 3.

248 Pronounced overestimation of the peak instantaneous pressure gradient commonly reported  
249 in the literature for conventional Doppler-derived indices is further confirmed in the current work,  
250 leading to superficial sensitivity of 1.00 for SBE compromising specificity. Conversely, sensitivity  
251 values  $<0.14$  will lead to a superficial diagnostic odds ratio (DOR) of infinity that positively  
252 correlates with balanced sensitivity and specificity under normal circumstance. This imbalance  
253 between sensitivity and specificity is particularly challenging in translational studies where  
254 intervention guidelines (e.g., CoA gradient) are ideally identified using invasive high-fidelity  
255 pressure measurements techniques such as catheterization, but results are being used in clinical  
256 setting based on non-invasive estimations such as echocardiography. Hence, the improved  
257 sensitivity-specificity balance observed in CFPG (Table 3) is promising evidence that this index  
258 can be of more potential value translationally. Particularly, in the setting complex CoA  
259 morphology, CFPG continues to deliver excellent balance between high sensitivity and specificity  
260 that is also evident in DORs when compared to conventional Doppler indices. In clinical practice,  
261 CFPG can be interpreted relative to the arm-leg cuff gradient identified using the current dataset.  
262 Table 4 summarized CFPG cutoffs for a range of clinically important CoA gradients.

263 The current results should be interpreted relative to several limitations. For example, literature  
264 suggests the arm-leg gradient may not be a strong predictor of invasive gradient in CoA patients<sup>1,30</sup>.  
265 Therefore, we expect the CFPG cutoffs obtained here may be different if sphygmomanometry data

266 are compared to gold-standard catheterization data, which were not available for the cohort of  
267 pediatric CoA patients studied. Additionally, the cohort studied represented pediatric patients.  
268 Hence, it remains to be determined if the relationships presented in Tables 2 and 4 are also  
269 generalizable to older CoA patients. Complex morphologies were generated in computational  
270 representations of rabbit aortas by replicating Z-scores seen clinically at the thoracic aorta for CoA  
271 patients. This is in contrast to using measurements from the echo data within the CoA region of  
272 pediatric patients that would need to be coupled with assumptions related to blood flow  
273 distributions and dimensions of the ascending aorta and its branches. Considering these limitations,  
274 clinical validation of CFPG in preventing postsurgical complications including hypertension has  
275 yet to be studied in future work.

276

## 277 **Supplementary materials**

278       Supplementary materials are available online.

279

## 280 **Acknowledgements**

281       The authors gratefully acknowledge the technical support from Leanne Harman, Lindsey  
282 Calvin, Jamasp Azarnoosh, and Chalani Ellepola.

283

284 **References:**

- 285 1. Ghorbannia A, Ellepola CD, Woods RK, Ibrahim E-SH, Maadooliat M, Ramirez HM, LaDisa  
286 JFJ. Clinical, Experimental, and Computational Validation of a New Doppler-Based Index  
287 for Coarctation Severity Assessment. *J Am Soc Echocardiogr Off Publ Am Soc Echocardiogr*  
288 2022;**35**:1311–1321.
- 289 2. Azarnoosh J, Ghorbannia A, Ibrahim E-SH, Jurkiewicz H, Kalvin L, LaDisa JF. Temporal  
290 evolution of mechanical stimuli from vascular remodeling in response to the severity and  
291 duration of aortic coarctation in a preclinical model. *Sci Rep* 2023;**13**:8352.
- 292 3. Ghorbannia A, Maadooliat M, Woods RK, Audi SH, Tefft BJ, Chiastra C, Ibrahim ESH,  
293 LaDisa JF. Aortic Remodeling Kinetics in Response to Coarctation-Induced Mechanical  
294 Perturbations. *Biomedicines* 2023;**11**:1817.
- 295 4. Sweeney MS, Walker WE, Duncan JM, Hallman GL, Livesay JJ, Cooley DA. Reoperation  
296 for aortic coarctation: techniques, results, and indications for various approaches. *Ann Thorac*  
297 *Surg* 1985;**40**:46–49.
- 298 5. Kenny D, Polson JW, Martin RP, Paton JF, Wolf AR. Hypertension and coarctation of the  
299 aorta: an inevitable consequence of developmental pathophysiology. *Hypertens Res*  
300 2011;**34**:543–547.
- 301 6. Feltes TF, Bacha E, Beekman RH, Cheatham JP, Feinstein JA, Gomes AS, Hijazi ZM, Ing  
302 FF, Moor M de, Morrow WR, Mullins CE, Taubert KA, Zahn EM. Indications for Cardiac  
303 Catheterization and Intervention in Pediatric Cardiac Disease. *Circulation* 2011;**123**:2607–  
304 2652.
- 305 7. Yang JC-T, Lin M-T, Jaw F-S, Chen S-J, Wang J-K, Shih TT-F, Wu M-H, Li Y-W. Trends  
306 in the utilization of computed tomography and cardiac catheterization among children with  
307 congenital heart disease. *J Formos Med Assoc Taiwan Yi Zhi* 2015;**114**:1061–1068.
- 308 8. Álvarez J, Aguilar F, Lurbe E. Blood pressure measurement in children and adolescents: key  
309 element in the evaluation of arterial hypertension. *An Pediatr* 2022;**96**:536.e1-536.e7.
- 310 9. Bird C, Michie C. Measuring blood pressure in children. *BMJ* 2008;**336**:1321.
- 311 10. Palatini P, Asmar R. Cuff challenges in blood pressure measurement. *J Clin Hypertens*  
312 *Greenwich Conn* 2018;**20**:1100–1103.
- 313 11. Agasthi P, Pujari SH, Tseng A, Graziano JN, Marcotte F, Majdalany D, Mookadam F, Hagler  
314 DJ, Arsanjani R. Management of adults with coarctation of aorta. *World J Cardiol*  
315 2020;**12**:167–191.
- 316 12. Lim DS, Ralston MA. Echocardiographic indices of Doppler flow patterns compared with  
317 MRI or angiographic measurements to detect significant coarctation of the aorta.  
318 *Echocardiogr Mt Kisco N* 2002;**19**:55–60.

- 319 13. Giardini A, Tacy TA. Pressure recovery explains doppler overestimation of invasive pressure  
320 gradient across segmental vascular stenosis. *Echocardiography* 2010;**27**:21–31.
- 321 14. Marx GR, Allen HD. Accuracy and pitfalls of Doppler evaluation of the pressure gradient in  
322 aortic coarctation. *J Am Coll Cardiol* 1986;**7**:1379–1385.
- 323 15. Ghorbannia A, Ellepola CD, Woods RK, LaDisa JF. Abstract 10882: Validation of a  
324 Continuous Flow Pressure Gradient for Coarctation Severity Assessment. *Circulation*  
325 2021;**144**:A10882–A10882.
- 326 16. Singh GK, Mowers KL, Marino C, Balzer D, Rao PS. Effect of Pressure Recovery on  
327 Pressure Gradients in Congenital Stenotic Outflow Lesions in Pediatric Patients-Clinical  
328 Implications of Lesion Severity and Geometry: A Simultaneous Doppler Echocardiography  
329 and Cardiac Catheter Correlative Study. *J Am Soc Echocardiogr Off Publ Am Soc*  
330 *Echocardiogr* 2020;**33**:207–217.
- 331 17. Menon A, Eddinger TJ, Wang H, Wendell DC, Toth JM, LaDisa Jr. JF. Altered  
332 hemodynamics, endothelial function, and protein expression occur with aortic coarctation  
333 and persist after repair. *Am J Physiol Heart Circ Physiol* 2012;**303**:H1304-18.
- 334 18. Menon A, Wendell DC, Wang H, Eddinger TJ, Toth JM, Dholakia RJ, Larsen PM, Jensen  
335 ES, Ladisa Jr. JF. A coupled experimental and computational approach to quantify  
336 deleterious hemodynamics, vascular alterations, and mechanisms of long-term morbidity in  
337 response to aortic coarctation. *J Pharmacol Toxicol Methods* 2012;**65**:18–28.
- 338 19. Updegrove A, Wilson NM, Merkow J, Lan H, Marsden AL, Shadden SC. SimVascular: An  
339 Open Source Pipeline for Cardiovascular Simulation. *Ann Biomed Eng* 2017;**45**:525–541.
- 340 20. Ghorbanniahassankiadeh A, Marks DS, LaDisa JF Jr. Correlation of Computational  
341 Instantaneous Wave-Free Ratio With Fractional Flow Reserve for Intermediate Multivessel  
342 Coronary Disease. *J Biomech Eng* 2021;**143**.
- 343 21. Teien DE, Wendel H, Björnebrink J, Ekelund L. Evaluation of anatomical obstruction by  
344 Doppler echocardiography and magnetic resonance imaging in patients with coarctation of  
345 the aorta. *Br Heart J* 1993;**69**:352–355.
- 346 22. Pfaller MR, Pham J, Verma A, Pegolotti L, Wilson NM, Parker DW, Yang W, Marsden AL.  
347 Automated generation of 0D and 1D reduced-order models of patient-specific blood flow. *Int*  
348 *J Numer Methods Biomed Eng* 2022;**n/a**:e3639.
- 349 23. LaDisa JFJ, Alberto Figueroa C, Vignon-Clementel IE, Kim HJ, Xiao N, Ellwein LM, Chan  
350 FP, Feinstein JA, Taylor CA. Computational simulations for aortic coarctation: representative  
351 results from a sampling of patients. *J Biomech Eng* 2011;**133**:091008.
- 352 24. Lopez L, Colan S, Stylianou M, Granger S, Trachtenberg F, Frommelt P, Pearson G, Camarda  
353 J, Cnota J, Cohen M, Dragulescu A, Frommelt M, Garuba O, Johnson T, Lai W, Mahgerefteh  
354 J, Pignatelli R, Prakash A, Sachdeva R, Soriano B, Soslow J, Spurney C, Srivastava S, Taylor  
355 C, Thankavel P, Velde M van der, Minich L. Relationship of Echocardiographic Z Scores



- 356 Adjusted for Body Surface Area to Age, Sex, Race, and Ethnicity. *Circ Cardiovasc Imaging*  
357 2017;**10**:e006979.
- 358 25. A. WC, G. WR, M. BT, S. CJ, M. CH, A. DJ, Pedro del N, W. FJ, P. GT, M. HZ, A. HS,  
359 Etta KM, J. LM, D. MP, J. RM, P. WE, D. WG. ACC/AHA 2008 Guidelines for the  
360 Management of Adults With Congenital Heart Disease. *Circulation* 2008;**118**:e714–e833.
- 361 26. YODEN WJ. Index for rating diagnostic tests. *Cancer* 1950;**3**:32–35.
- 362 27. Koo TK, Li MY. A Guideline of Selecting and Reporting Intraclass Correlation Coefficients  
363 for Reliability Research. *J Chiropr Med* 2016;**15**:155–163.
- 364 28. Cicchetti D V. Guidelines, criteria, and rules of thumb for evaluating normed and  
365 standardized assessment instruments in psychology. *Psychol Assess* 1994;**6**:284–290.
- 366 29. Vlahos AP, Marx GR, McElhinney D, Oneill S, Goudevenos I, Colan SD. Clinical utility of  
367 Doppler echocardiography in assessing aortic stenosis severity and predicting need for  
368 intervention in children. *Pediatr Cardiol* 2008;**29**:507–514.
- 369 30. Patankar N, Fernandes N, Kumar K, Manja V, Lakshminrusimha S. Does measurement of  
370 four-limb blood pressures at birth improve detection of aortic arch anomalies? *J Perinatol*  
371 *Off J Calif Perinat Assoc* 2016;**36**:376–380.
- ~~372~~

374 **List of Tables**

375 *Table 1- Characteristics for pediatric patients with discrete and complex CoA.*

| CoA Morphology                     | Discrete |      | Complex* |      | p-values† |
|------------------------------------|----------|------|----------|------|-----------|
|                                    | N        | %    | N        | %    |           |
| <b>Sex</b>                         |          |      |          |      |           |
| Male                               | 22       | 88   | 27       | 63   |           |
| Female                             | 3        | 12   | 16       | 37   |           |
| Total                              | 25       |      | 43       |      |           |
| <b>Race and ethnicity</b>          | N        | %    | N        | %    |           |
| White non-Hispanic                 | 20       | 80   | 29       | 67   |           |
| White Hispanic                     | 2        | 8    | 10       | 23   |           |
| Black or African American          | 3        | 12   | 4        | 9    |           |
| <b>Pre-op echo characteristics</b> | Mean     | ±SD  | Mean     | ±SD  |           |
| Age [month]                        | 29.5     | 9.10 | 30.9     | 15.6 | 0.73      |
| Weight [kg]                        | 13.1     | 3.85 | 13.3     | 4.00 | 0.91      |
| Height [cm]                        | 77.2     | 9.30 | 79.1     | 14.5 | 0.89      |
| BSA [m <sup>2</sup> ]              | 0.77     | 0.21 | 0.73     | 0.12 | 0.66      |
| SBP [mmHg]                         | 99.0     | 6.30 | 103.0    | 8.10 | 0.49      |
| DBP [mmHg]                         | 63.6     | 4.08 | 57.2     | 11.8 | 0.17      |
| Arm-leg systolic gradient          | 26.2     | 6.11 | 32.7     | 3.29 | <0.001    |
| <b>Arch Diameter Z-scores</b>      | Mean     | ±SD  | Mean     | ±SD  |           |
| Proximal Transverse Arch           | -2.0     | 0.6  | -3.2     | 0.8  | 0.03      |
| Distal Transverse Arch             | -2.3     | 0.7  | -3.0     | 0.7  | 0.16      |
| Aortic Isthmus                     | -2.3     | 0.7  | -3.2     | 1.5  | 0.23      |
| Min proximal Z-score               | -2.5     | 0.5  | -4.1     | 0.9  | 0.01      |

\*CoA morphology was classified as Complex in presence of at least one additional narrowing at either the proximal transverse arch, distal transverse arch, or aortic isthmus. Classification was based on a Z-scores < -3 (i.e., the lowest 0.1 percentile of population according to Lopez et al<sup>24</sup>)

†p-values quantified through two-tail student t-test

BSA: body surface area, DBP: diastolic blood pressure, SBP: Systolic blood pressure

376

377

378 *Table 2- Diagnostic performance of Doppler-derived indices in pediatric CoA patients at*  
 379 *optimum ROC cutoffs.*

| Index  | Morphology | Diagnostic Performance |       |      |      |       | ROC measures |        |      |         |
|--------|------------|------------------------|-------|------|------|-------|--------------|--------|------|---------|
|        |            | Sen.                   | Spec. | PPV  | NPV  | DOR   | DA           | Cutoff | AUC  | p-value |
| SBE    | Discrete   | 0.92                   | 0.82  | 0.86 | 0.90 | 54.00 | 0.88         | 43.0   | 0.91 |         |
|        | Complex    | 0.86                   | 0.42  | 0.69 | 0.71 | 5.536 | 0.69         | 39.1   | 0.80 | <0.01   |
| MBE    | Discrete   | 0.92                   | 0.82  | 0.86 | 0.90 | 53.79 | 0.87         | 31.8   | 0.91 |         |
|        | Complex    | 0.44                   | 0.90  | 0.85 | 0.45 | 6.964 | 0.59         | 41.8   | 0.83 | <0.01   |
| SBE-RP | Discrete   | 0.76                   | 0.82  | 0.83 | 0.75 | 15.00 | 0.79         | 32.5   | 0.90 |         |
|        | Complex    | 0.57                   | 0.69  | 0.82 | 0.31 | 2.925 | 0.59         | 24.9   | 0.85 | <0.01   |
| CFPG   | Discrete   | 0.98                   | 0.91  | 0.93 | 0.91 | 495.4 | 0.96         | 2.52   | 0.99 |         |
|        | Complex    | 0.86                   | 0.79  | 0.83 | 0.96 | 23.12 | 0.88         | 2.14   | 0.98 | >0.10   |

AUC: area under the ROC curve, CFPG: continuous flow pressure gradient, DA: diagnostic accuracy, DOR: diagnostic odds ratio, MBE: modified Bernoulli equation, NPV: negative predictive value, PPV: positive predictive value, SBE: simplified Bernoulli equation, SBE-RP: simplified Bernoulli equation with recovered pressure term. The optimum cutoff value [mmHg] for Doppler indices was computed based on maximizing the sum of sensitivity and specificity, that is, the Youden index<sup>28</sup> to best represent the current intervention criterion of a trans-coarctation peak-to-peak gradient  $\geq 20$  mmHg. p-values represent statistical difference of AUC between complex and discrete CoA morphologies using two-tailed student t-test.

380

381

382 *Table 3- Diagnostic performance of Doppler-derived indices calculated at optimal ROC-derived*  
 383 *cutoffs based on simulation results. Note the behavior from simulations is similar to data from*  
 384 *pediatric CoA patients, with CFPG being a more consistent measure of diagnostic performance*  
 385 *and ROC measures. This similarity allows for further analysis of those aspects of hemodynamics*  
 386 *and performance impacting Doppler-based indices using the simulation results.*

| Index  | Morphology | Diagnostic Performance |       |      |      |       | ROC measures |        |      |         |
|--------|------------|------------------------|-------|------|------|-------|--------------|--------|------|---------|
|        |            | Sen.                   | Spec. | PPV  | NPV  | DOR   | DA           | Cutoff | AUC  | p-value |
| SBE    | Discrete   | 1.00                   | 0.14  | 0.60 | 1.00 | Inf   | 0.63         | 44.8   | 0.90 | <0.01   |
|        | Complex    | 1.00                   | 0.12  | 0.44 | 1.00 | Inf   | 0.48         | 40.9   | 0.83 |         |
| MBE    | Discrete   | 0.85                   | 0.81  | 0.73 | 0.90 | 25.29 | 0.82         | 39.9   | 0.90 | <0.01   |
|        | Complex    | 0.84                   | 0.78  | 0.67 | 0.88 | 32.02 | 0.80         | 48.7   | 0.86 |         |
| SBE-RP | Discrete   | 0.83                   | 0.79  | 0.75 | 0.87 | 19.11 | 0.80         | 35.8   | 0.89 | <0.01   |
|        | Complex    | 0.86                   | 0.74  | 0.68 | 0.82 | 22.12 | 0.73         | 35.8   | 0.83 |         |
| CFPG   | Discrete   | 0.92                   | 0.83  | 0.84 | 0.91 | 60.09 | 0.90         | 3.01   | 0.98 | >0.10   |
|        | Complex    | 0.88                   | 0.81  | 0.85 | 0.88 | 38.02 | 0.83         | 2.65   | 0.98 |         |

AUC: area under the ROC curve, CFPG: continuous flow pressure gradient, DA: diagnostic accuracy, DOR: diagnostic odds ratio, MBE: modified Bernoulli equation, NPV: negative predictive value, PPV: positive predictive value, SBE: simplified Bernoulli equation, SBE-RP: simplified Bernoulli equation with recovered pressure term. The optimum cutoff value [mmHg] for Doppler-derived indices was computed based on maximizing the sum of sensitivity and specificity (i.e. the Youden index<sup>26</sup>) to best represent the current intervention criterion of a trans-coarctation peak-to-peak gradient  $\geq 20$  mmHg. p-values represent statistical difference of AUC between complex and discrete CoA morphologies using two-tailed student t-test.

387

388

389 *Table 4- CFPG cutoffs for a range of clinically important CoA gradients.*

| CoA Gradient<br>[mmHg] | Pediatric CoA Patient CFPG cutoff |             |
|------------------------|-----------------------------------|-------------|
|                        | Discrete                          | Complex     |
| 10                     | 0.81                              | 0.73        |
| 15                     | 1.46                              | 1.28        |
| <b>20**</b>            | <b>2.52</b>                       | <b>2.14</b> |
| 25                     | 4.20                              | 3.45        |
| 30                     | 6.90                              | 5.49        |
| 35                     | 11.22                             | 8.63        |
| 40                     | 18.14                             | 13.47       |

CFPG: Continuous flow pressure gradient

390

391

392 **List of Figures**

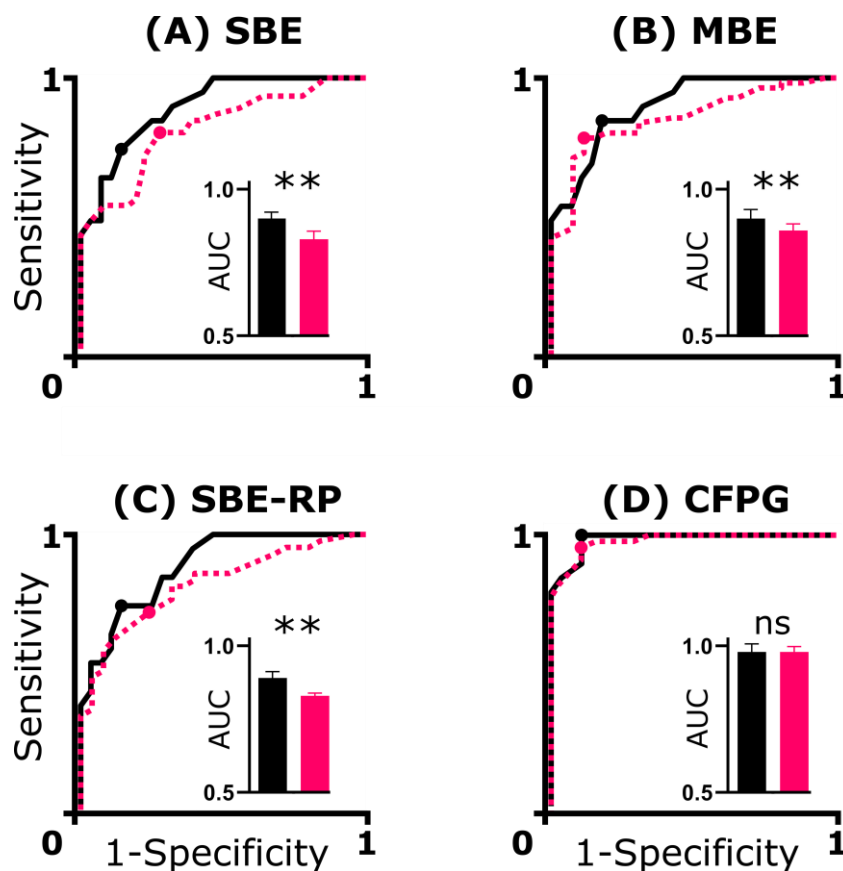

393  
 394 *Figure 1- Receiver operative characteristic (ROC) curves for Doppler-derived indices of CoA*  
 395 *severity calculated from simulations. CoA were classified according to the current clinical*  
 396 *threshold (i.e., peak-to-peak trans-coarctation gradient  $\geq 20$  mmHg). The optimal cutoff value for*  
 397 *Doppler indices, as reported in Table 3, was computed based on maximizing the sum of*  
 398 *sensitivity and specificity (i.e. the Youden index<sup>26</sup> indicated in dots for each ROC curve). Results*  
 399 *are presented for Discrete (black-solid), and complex CoA morphologies (pink-dashed). CFPG:*  
 400 *continuous flow pressure gradient, MBE: modified Bernoulli equation, RP: recovered pressure,*  
 401 *SBE: simplified Bernoulli equation. Bar plots represent statistical difference of AUC between*  
 402 *complex (pink) and discrete (black) CoA morphologies using student t-test with \*\* and ns*  
 403 *indicating two-tail p-value  $< 0.01$  and  $> 0.1$ .*

404

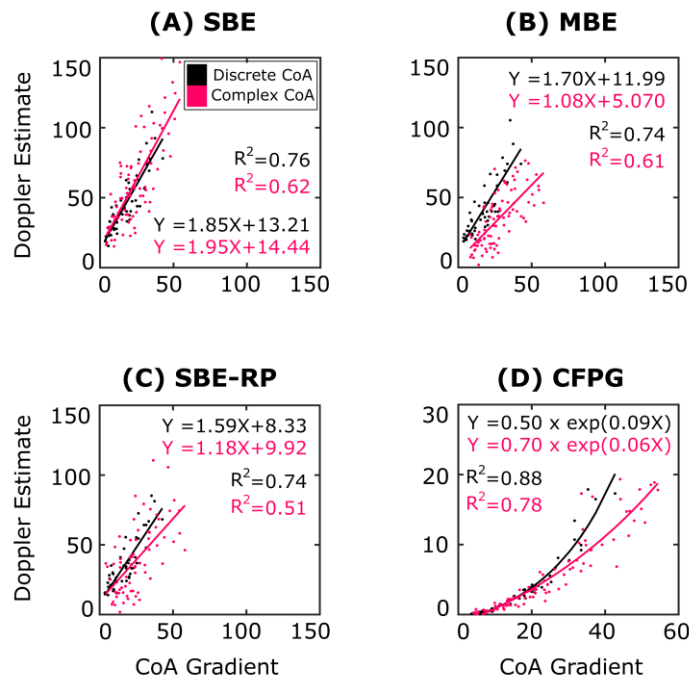

405

406 *Figure 2- Comparison of Doppler-based indices from simulation results of discrete (black) and*  
407 *complex (pink) CoA morphologies. Doppler-derived indices (vertical-axis) were quantified from*  
408 *simulations using equations in Supplemental Table 1 including the (A) simplified Bernoulli*  
409 *equation (SBE) and its modified versions, i.e., (B) MBE, and (C) SBE-RP, as well as the*  
410 *continuous flow pressure gradient (CFPG). Adjusted  $R^2$  in linear regression analysis (solid*  
411 *lines) quantified degree of scatter resulting from each Doppler-derived index for discrete and*  
412 *complex CoA morphologies. The carotid artery to descending aorta pressure gradient was also*  
413 *quantified from simulation results to mimic the gold-standard CoA gradient from catheterization*  
414 *(horizontal axis). Differences in performance for Doppler indices are rooted in the fact that the*  
415 *CFPG includes several additional sub-indices described in Supplemental Table 1, namely the*  
416 *DVI and dPHT, which consider the hemodynamic changes resulting in complex CoA cases*  
417 *leading to a nonlinear correlation (Panel D and Supplemental Figure 3) more sensitive to*  
418 *higher CoA severities.*

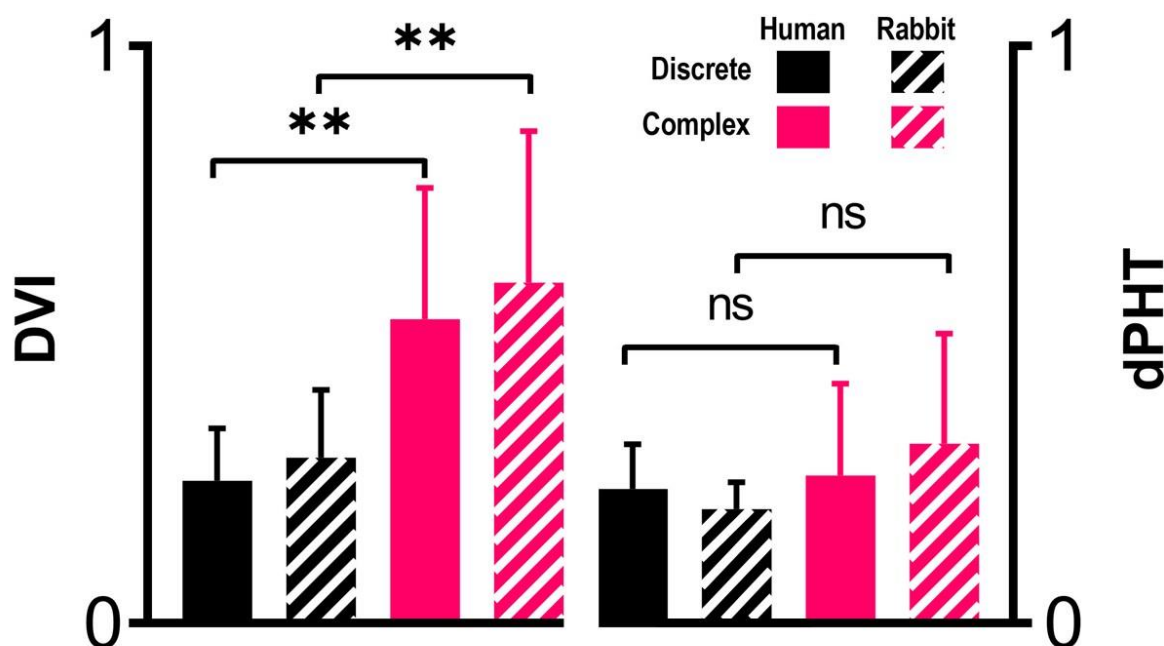

419  
420 *Figure 3- DVI (left) and dPHT (right) ratios for discrete (black) and complex (pink) CoA*  
421 *morphologies. No significant changes were observed in any of the indices between our cohort of*  
422 *pediatric CoA patients and simulations matching Z-scores for aortic morphology (p-value >0.1).*  
423 *There was a significant increase in DVI from discrete to complex CoA morphology in both our*  
424 *cohort of pediatric CoA patients (p-values <0.01), and simulations helped to reveal this finding*  
425 *is due to flow acceleration proximal to the CoA caused by hypoplastic arch, isthmus, or both. No*  
426 *significant differences were observed in dPHT among morphologies (p-values >0.1). p-values*  
427 *quantified using a two-tail student t-tests with 0.01 significance level.*

428
